# Supplementary material for: Aspartic Acid Residue 51 of SaeR Is Essential for Staphylococcus aureus Virulence
Source: PubMed Central journal article supplement (PMC6302044; doi:10.3389/fmicb.2018.03085), 2018-12-14
Supplement: Data_Sheet_2.pdf [file Data_Sheet_2.pdf]

## Supplementary Table 1

| Primer         | Sequence                                                                       |
|----------------|--------------------------------------------------------------------------------|
| saeR-Fwd-attB1 | 5'- GGG GAC AAG TTT GTA CAA AAA AGC AGG CCA TTG CTT GCG TAA TTT CCG -3'        |
| saeR-Rvs-attB2 | 5'- GGG GAC CAC TTT GTA CAA GAA AGC TGG GTG CTC ACG TCA TCT TC -3'             |
| saeR-D46A-fwd  | 5'- CTT TAC TAT CAA ATG ATA TTG CGA TCA TGG TAC TTG ATA TCA TG -3'             |
| saeR-D46A-rvs  | 5'- CAT GAT ATC AAG TAC CAT GAT CGC AAT ATC ATT TGA TAG TAA AG -3'             |
| saeR-D51A-fwd  | 5'- GAT ATT GAT ATC ATG GTA CTT GCG ATC ATG ATG CCA GAA GTT AAT G-3            |
| saeR-D51A-rvs  | 5'- CAT TAA CTT CTG GCA TCA TGA TCG CAA GTA CCA TGA TAT CAA TAT C -3'          |
| saeR-D61A-fwd  | 5'- GAT GCC AGA AGT TAA TGG TTA CGC GAT TGT CAA AGA AAT GAA AAG -3'            |
| saeR-D61A-rvs  | 5'- CTT TTC ATT TCT TTG ACA ATC GCG TAA CCA TTA ACT TCT GGC ATC -3'            |
| spn-Fwd-attB1  | 5'- GGG GAC CAC TTT GTA CAA GAA AGC TGG GTC CTT TCA GGT CCC CAT CAA TAT GC -3' |
| spn-Rvs-attB2  | 5'- GGG GAC AAG TTT GTA CAA AAA AGC AGG CGG TTC AGG TAT TAT TAA AGG CC 3'      |
| spn-check-Fwd  | 5'- CTA ACG GAT TCC CGA TTA CCT G -3'                                          |
| spn-check-rvs  | 5'- CGT CCA CAT CCC TTT GTC AC -3'                                             |
| saePQRS_fwd    | 5'- GAC AAA AAG GGG AAT CTA AGT GGT C -3'                                      |
| saePQRS_rvs    | 5'- CAT TTT TAG CCC CTG CCA TTT TC -3'                                         |
| saePQRS-Seq1   | 5'- GTG TAA TGT TAC AGT CAT CGT AGT TC -3'                                     |
| saePQRS-Seq2   | 5'- CAT GGG CTA AGT TTT GAA TCA GTT C -3'                                      |
| saePQRS-Seq3   | 5'- GTC TTG TTC ATC ATC CAC GAT C -3                                           |
| saePQRS-Seq4   | 5'- GAA CAG GAA GTG TTT GAG CTC -3'                                            |
| saePQRS-Seq5   | 5'- GTA GTC AAC CAT TGC GAT TTC TTT AC -3'                                     |
| saeR-Xho-rvs   | 5'- ACC ACC CTC GAG CTC GAT ACG ACG CCA ATA ATG -3'                            |
| saeR-EcoRI-fwd | 5'- ACC ACC GAA TTC GAG GTC GTA AGA ACA GAG GTG -3'                            |
